# Supplementary material
Source: MDPI journal article supplement (https://www.mdpi.com/2073-4395/11/9/1745)
Supplement: s1 [file agronomy-1342846-supplementary.pdf › agronomy-1342846-supplementary.pdf]

**Supplementary Table S1.** Differences in bacterial and archaeal (*Candidatus Nitrososphaera*) taxa between treatments compared to untreated controls based on ANOVA comparisons of relative abundance. Taxa that were distinctive at the  $P < 0.05$  level between food waste compost and controls are indicated by x. Differences from controls with the addition of dairy manure compost are indicated by \* and differences from nitrogen treatments by #. The symbols + and - indicate whether taxa increased or decreased with the treatment compared to controls. Taxa are listed in order of most abundant to least abundant in the dataset.

| Genus                            | Phylum         | Jul 2016 | Oct 2016 | Jul 2017 | Oct 2017 |
|----------------------------------|----------------|----------|----------|----------|----------|
| <i>Rubrobacter</i>               | Actinobacteria | x -      |          |          |          |
| <i>Microvirga</i>                | Proteobacteria |          |          |          |          |
| <i>Candidatus_Nitrososphaera</i> | Thaumarchaeota |          |          |          |          |
| <i>Pseudarthrobacter</i>         | Actinobacteria |          | x -      |          |          |
| <i>Bacillus</i>                  | Firmicutes     |          |          |          |          |
| RB-41                            | Acidobacteria  |          |          | * -      | #-       |
| <i>Solirubrobacter</i>           | Actinobacteria | x -      |          |          |          |
| <i>Sphingomonas</i>              | Proteobacteria |          |          |          |          |
| <i>Lysinibacillus</i>            | Firmicutes     | x +      |          |          |          |
| MND1                             | Proteobacteria |          |          |          |          |
| <i>Steroidobacter</i>            | Proteobacteria |          |          |          |          |
| <i>Streptomyces</i>              | Actinobacteria |          |          |          |          |
| <i>Blastococcus</i>              | Actinobacteria |          |          |          |          |
| <i>Bryobacter</i>                | Acidobacteria  |          |          |          |          |
| <i>Nitrospira</i>                | Nitrospirae    |          |          |          |          |
| <i>Gaiella</i>                   | Actinobacteria |          |          |          |          |
| <i>Paenibacillus</i>             | Firmicutes     |          |          |          |          |
| <i>Psychroglaciacola</i>         | Proteobacteria |          | x -      |          |          |
| <i>Nocardioides</i>              | Actinobacteria |          |          |          |          |
| <i>Adhaeribacter</i>             | Bacteroidetes  |          | x -      |          |          |

**Supplementary Table S2.** Differences in bacterial and archaeal (*Candidatus Nitrososphaera*) taxa between other treatments compared to the fertilizer treatment, based on ANOVA comparisons of relative abundance. Taxa that were distinctive at the  $P < 0.05$  level between food waste compost and fertilizer are indicated by x. Differences from fertilizer with the addition of dairy manure compost are indicated by \* and differences from control treatments by #. The symbols + and - indicate whether taxa increased or decreased with the treatment compared to the fertilizer treatment. Taxa are listed in order of most abundant to least abundant in the dataset.

| Genus                            | Phylum         | Jul 2016 | Oct 2016 | Jul 2017 | Oct 2017 |
|----------------------------------|----------------|----------|----------|----------|----------|
| <i>Rubrobacter</i>               | Actinobacteria |          | x -      |          |          |
| <i>Microvirga</i>                | Proteobacteria |          |          |          |          |
| <i>Candidatus_Nitrososphaera</i> | Thaumarchaeota |          |          |          |          |
| <i>Pseudarthrobacter</i>         | Actinobacteria | * - x -  |          |          |          |
| <i>Bacillus</i>                  | Firmicutes     |          |          |          |          |
| <i>RB-41</i>                     | Acidobacteria  |          |          |          |          |
| <i>Solirubrobacter</i>           | Actinobacteria |          | x -      |          |          |
| <i>Sphingomonas</i>              | Proteobacteria |          |          |          |          |
| <i>Lysinibacillus</i>            | Firmicutes     | x +      |          |          |          |
| <i>MND1</i>                      | Proteobacteria |          |          |          | * +      |
| <i>Steroidobacter</i>            | Proteobacteria |          |          |          | * + x +  |
| <i>Streptomyces</i>              | Actinobacteria |          |          |          |          |
| <i>Blastococcus</i>              | Actinobacteria |          | x -      |          |          |
| <i>Bryobacter</i>                | Acidobacteria  |          |          |          |          |
| <i>Nitrospira</i>                | Nitrospirae    |          |          |          |          |
| <i>Gaiella</i>                   | Actinobacteria |          |          |          |          |
| <i>Paenibacillus</i>             | Firmicutes     |          | * -      |          |          |
| <i>Psychroglacielcola</i>        | Proteobacteria |          |          |          |          |
| <i>Nocardioides</i>              | Actinobacteria |          |          |          |          |
| <i>Adhaeribacter</i>             | Bacteroidetes  |          |          |          |          |
